# Supplementary material for: Unveiling anticancer, antimicrobial, and antioxidant activities of novel synthesized bimetallic boron oxide–zinc oxide nanoparticles
Source: Royal Society of Chemistry journal article supplement (doi:10.1039/d3ra03413e), 2023-01-01
Supplement: d3ra03413e1.pdf [file d3ra03413e1.pdf]

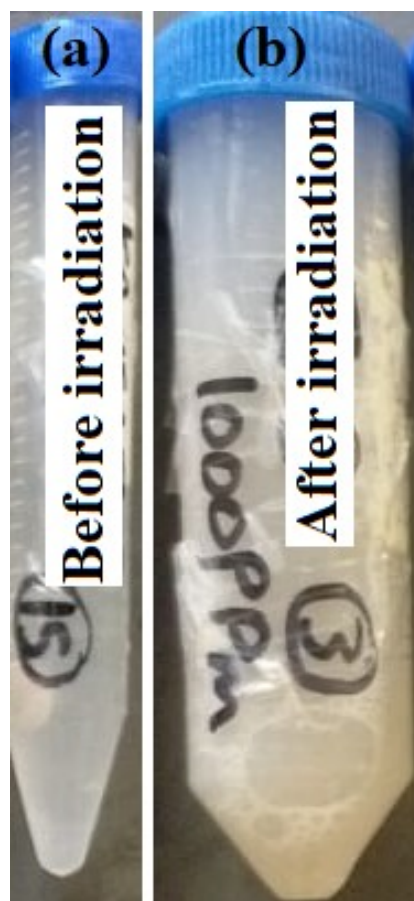

**Figure S1: The change in color before and after gamma irradiation where (a), the faint white color of the prepared synthetic solution, and (b) the deep off-white color of the synthesized bimetallic  $B_2O_3$ -ZnO NPs.**
